# Supplementary material for: Programme evaluation training for health professionals in francophone Africa: process, competence acquisition and use
Source: Springer Nature journal article supplement (doi:10.1186/1478-4491-7-3), 2009-01-15
Supplement: Additional file 5 [file 1478-4491-7-3-s5.pdf]

**ANNEX TABLE: RESULTS ON EVALUATION OF COMPETENCIES - COHORT 1 AND COHORT 2**

|            |                                                                                | LEARNING                             |      |         |       |          |      |         |       |                                        |       |         |       | BEHAVIOR vs LEARNING                                                    |       |         |       |
|------------|--------------------------------------------------------------------------------|--------------------------------------|------|---------|-------|----------|------|---------|-------|----------------------------------------|-------|---------|-------|-------------------------------------------------------------------------|-------|---------|-------|
| items no.  | LISTE des COMPETENCES                                                          | Before - After the training sessions |      |         |       |          |      |         |       | 1 year after - After training sessions |       |         |       | 1 year after                                                            |       |         |       |
|            |                                                                                | COHORT 1                             |      |         |       | COHORT 2 |      |         |       | COHORT 1                               |       |         |       | COHORT 1                                                                |       |         |       |
|            |                                                                                | N                                    | Mean | Std dev | p     | N        | Mean | Std dev | p     | N                                      | Mean  | Std dev | p     | N                                                                       | Mean  | Std dev | p     |
| <b>1.0</b> | <b>Professional Practice</b>                                                   |                                      |      |         |       |          |      |         |       |                                        |       |         |       |                                                                         |       |         |       |
| 1.1        | Applies professional evaluation standards                                      | 16                                   | 1,50 | 0,516   | 0,000 | 19       | 1,79 | 0,419   | 0,000 | 13                                     | 0,31  | 0,630   | 0,104 | 8                                                                       | -0,38 | 0,744   | 0,197 |
| 1.2        | Acts ethically and strives for integrity and honesty in conducting evaluations | 16                                   | 1,50 | 0,816   | 0,000 | 19       | 1,53 | 0,612   | 0,000 | 13                                     | -0,23 | 0,725   | 0,273 | 8                                                                       | 0,13  | 0,354   | 0,351 |
| 1.3        | Conveys personal evaluation approaches and skills to potential clients         | 17                                   | 1,82 | 0,636   | 0,000 | 19       | 1,68 | 0,671   | 0,000 | 14                                     | 0,00  | 0,679   | 1,000 | 8                                                                       | -0,13 | 0,354   | 0,351 |
| 1.4        | Respects clients, respondents, program participants, and other stakeholders    | 16                                   | 1,56 | 0,814   | 0,000 | 19       | 1,26 | 1,195   | 0,000 | 14                                     | 0,00  | 0,679   | 1,000 | t cannot be computed because the standard error of the difference is 0. |       |         |       |
| 1.5        | Considers the general and public welfare in evaluation practice                | 15                                   | 1,47 | 0,743   | 0,000 | 19       | 1,74 | 0,933   | 0,000 | 12                                     | 0,00  | 0,426   | 1,000 | 8                                                                       | -0,63 | 1,061   | 0,140 |
| 1.6        | Contributes to the knowledge base of evaluation                                | 15                                   | 1,80 | 0,561   | 0,000 | 19       | 2,00 | 0,577   | 0,000 | 12                                     | 0,08  | 0,515   | 0,586 | 8                                                                       | -0,50 | 0,926   | 0,170 |

**ANNEX TABLE: RESULTS ON EVALUATION OF COMPETENCIES - COHORT 1 AND COHORT 2**

|            |                                                                                       | LEARNING                             |      |         |       |          |      |         |       |                                        |       |         |       | BEHAVIOR vs LEARNING                                                    |       |         |       |
|------------|---------------------------------------------------------------------------------------|--------------------------------------|------|---------|-------|----------|------|---------|-------|----------------------------------------|-------|---------|-------|-------------------------------------------------------------------------|-------|---------|-------|
| items no.  | LISTE des COMPETENCES                                                                 | Before - After the training sessions |      |         |       |          |      |         |       | 1 year after - After training sessions |       |         |       | 1 year after                                                            |       |         |       |
|            |                                                                                       | COHORT 1                             |      |         |       | COHORT 2 |      |         |       | COHORT 1                               |       |         |       | COHORT 1                                                                |       |         |       |
|            |                                                                                       | N                                    | Mean | Std dev | p     | N        | Mean | Std dev | p     | N                                      | Mean  | Std dev | p     | N                                                                       | Mean  | Std dev | p     |
| <b>2.0</b> | <b>Systematic Inquiry</b>                                                             |                                      |      |         |       |          |      |         |       |                                        |       |         |       |                                                                         |       |         |       |
| 2.1        | Understands the knowledge base of evaluation (terms, concepts, theories, assumptions) | 17                                   | 1,82 | 0,529   | 0,000 | 19       | 1,74 | 0,806   | 0,000 | 15                                     | 0,07  | 0,704   | 0,719 | 8                                                                       | -0,13 | 0,354   | 0,351 |
| 2.2        | Knowledgeable about quantitative methods                                              | 17                                   | 1,29 | 0,588   | 0,000 | 19       | 1,05 | 0,524   | 0,000 | 14                                     | 0,21  | 0,802   | 0,336 | 7                                                                       | -0,29 | 0,488   | 0,172 |
| 2.3        | Knowledgeable about qualitative methods                                               | 17                                   | 1,12 | 0,600   | 0,000 | 19       | 1,26 | 0,733   | 0,000 | 14                                     | -0,07 | 0,829   | 0,752 | 8                                                                       | 0,25  | 0,463   | 0,170 |
| 2.4        | Knowledgeable about mixed methods                                                     | 16                                   | 1,31 | 0,479   | 0,000 | 19       | 1,42 | 0,692   | 0,000 | 13                                     | 0,08  | 0,760   | 0,721 | 8                                                                       | 0,13  | 0,641   | 0,598 |
| 2.5        | Conducts literature reviews                                                           | 17                                   | 1,41 | 0,618   | 0,000 | 19       | 1,00 | 0,745   | 0,000 | 14                                     | -0,36 | 0,742   | 0,136 | 7                                                                       | -0,29 | 0,488   | 0,172 |
| 2.6        | Specifies program theory                                                              | 16                                   | 2,06 | 0,443   | 0,000 | 19       | 1,84 | 0,501   | 0,000 | 14                                     | -0,21 | 0,802   | 0,336 | t cannot be computed because the standard error of the difference is 0. |       |         |       |
| 2.7        | Frames evaluation questions                                                           | 17                                   | 1,88 | 0,600   | 0,000 | 19       | 1,79 | 0,419   | 0,000 | 15                                     | 0,07  | 0,594   | 0,670 | 8                                                                       | -0,13 | 0,354   | 0,351 |

**ANNEX TABLE: RESULTS ON EVALUATION OF COMPETENCIES - COHORT 1 AND COHORT 2**

|           |                              | LEARNING                             |      |         |       |          |      |         |       |                                        |       |         |       | BEHAVIOR vs LEARNING |       |         |       |
|-----------|------------------------------|--------------------------------------|------|---------|-------|----------|------|---------|-------|----------------------------------------|-------|---------|-------|----------------------|-------|---------|-------|
| items no. | LISTE des COMPETENCES        | Before - After the training sessions |      |         |       |          |      |         |       | 1 year after - After training sessions |       |         |       | 1 year after         |       |         |       |
|           |                              | COHORT 1                             |      |         |       | COHORT 2 |      |         |       | COHORT 1                               |       |         |       | COHORT 1             |       |         |       |
|           |                              | N                                    | Mean | Std dev | p     | N        | Mean | Std dev | p     | N                                      | Mean  | Std dev | p     | N                    | Mean  | Std dev | p     |
| 2.8       | Develops evaluation designs  | 17                                   | 1,94 | 0,659   | 0,000 | 19       | 1,95 | 0,621   | 0,000 | 15                                     | -0,20 | 0,676   | 0,271 | 8                    | -0,13 | 0,354   | 0,351 |
| 2.9       | Identifies data sources      | 16                                   | 1,25 | 0,931   | 0,000 | 19       | 1,26 | 0,806   | 0,000 | 15                                     | -0,07 | 0,458   | 0,582 | 7                    | -0,14 | 0,378   | 0,356 |
| 2.10      | Collects data                | 17                                   | 1,06 | 0,827   | 0,000 | 19       | 0,89 | 0,658   | 0,000 | 15                                     | -0,07 | 0,704   | 0,719 | 8                    | -0,13 | 0,354   | 0,351 |
| 2.11      | Assesses validity of data    | 17                                   | 1,47 | 0,514   | 0,000 | 19       | 1,16 | 0,765   | 0,000 | 15                                     | -0,07 | 0,704   | 0,719 | 8                    | 0,00  | 0,535   | 1,000 |
| 2.12      | Assesses reliability of data | 17                                   | 1,29 | 0,849   | 0,000 | 19       | 1,11 | 0,658   | 0,000 | 15                                     | -0,20 | 0,676   | 0,271 | 8                    | -0,25 | 0,463   | 0,170 |
| 2.13      | Analyzes data                | 16                                   | 1,13 | 0,719   | 0,000 | 19       | 1,00 | 0,667   | 0,000 | 15                                     | -0,13 | 0,352   | 0,164 | 8                    | 0,00  | 0,535   | 1,000 |
| 2.14      | Interprets data              | 14                                   | 0,93 | 0,616   | 0,000 | 19       | 0,89 | 0,658   | 0,000 | 14                                     | -0,07 | 0,267   | 0,336 | 8                    | -0,13 | 0,354   | 0,351 |
| 2.15      | Makes judgements             | 17                                   | 1,06 | 0,827   | 0,000 | 19       | 1,11 | 0,658   | 0,000 | 15                                     | 0,13  | 0,516   | 0,334 | 8                    | -0,13 | 0,354   | 0,351 |

**ANNEX TABLE: RESULTS ON EVALUATION OF COMPETENCIES - COHORT 1 AND COHORT 2**

|           |                                                             | LEARNING                             |      |         |       |          |      |         |       |                                        |       |         |       | BEHAVIOR vs LEARNING                                                    |       |         |       |
|-----------|-------------------------------------------------------------|--------------------------------------|------|---------|-------|----------|------|---------|-------|----------------------------------------|-------|---------|-------|-------------------------------------------------------------------------|-------|---------|-------|
| items no. | LISTE des COMPETENCES                                       | Before - After the training sessions |      |         |       |          |      |         |       | 1 year after - After training sessions |       |         |       | 1 year after                                                            |       |         |       |
|           |                                                             | COHORT 1                             |      |         |       | COHORT 2 |      |         |       | COHORT 1                               |       |         |       | COHORT 1                                                                |       |         |       |
|           |                                                             | N                                    | Mean | Std dev | p     | N        | Mean | Std dev | p     | N                                      | Mean  | Std dev | p     | N                                                                       | Mean  | Std dev | p     |
| 2.16      | Develops recommendations                                    | 17                                   | 1,35 | 0,702   | 0,000 | 19       | 1,11 | 0,459   | 0,000 | 15                                     | -0,13 | 0,640   | 0,433 | 8                                                                       | -0,13 | 0,354   | 0,351 |
| 2.17      | Provides rationales for decisions throughout the evaluation | 17                                   | 1,71 | 0,772   | 0,000 | 19       | 1,68 | 0,582   | 0,000 | 15                                     | -0,40 | 0,910   | 0,111 | 7                                                                       | -0,14 | 0,690   | 0,604 |
| 2.18      | Reports evaluation procedures and results                   | 15                                   | 1,73 | 0,704   | 0,000 | 19       | 1,74 | 0,562   | 0,000 | 12                                     | -0,17 | 0,389   | 0,166 | t cannot be computed because the standard error of the difference is 0. |       |         |       |
| 2.19      | Notes strengths and limitations of the evaluation           | 16                                   | 1,63 | 0,500   | 0,000 | 19       | 1,74 | 0,562   | 0,000 | 15                                     | -0,27 | 0,594   | 0,104 | 8                                                                       | -0,13 | 0,354   | 0,351 |
| 2.20      | Conducts meta-evaluations                                   | 15                                   | 0,93 | 0,704   | 0,000 | 19       | 1,42 | 0,607   | 0,000 | 13                                     | -0,08 | 0,760   | 0,721 | 8                                                                       | -0,50 | 0,929   | 0,170 |

**ANNEX TABLE: RESULTS ON EVALUATION OF COMPETENCIES - COHORT 1 AND COHORT 2**

|            |                                                                  | LEARNING                             |      |         |       |          |      |         |       |                                        |       |         |       | BEHAVIOR vs LEARNING |       |         |       |
|------------|------------------------------------------------------------------|--------------------------------------|------|---------|-------|----------|------|---------|-------|----------------------------------------|-------|---------|-------|----------------------|-------|---------|-------|
| items no.  | LISTE des COMPETENCES                                            | Before - After the training sessions |      |         |       |          |      |         |       | 1 year after - After training sessions |       |         |       | 1 year after         |       |         |       |
|            |                                                                  | COHORT 1                             |      |         |       | COHORT 2 |      |         |       | COHORT 1                               |       |         |       | COHORT 1             |       |         |       |
|            |                                                                  | N                                    | Mean | Std dev | p     | N        | Mean | Std dev | p     | N                                      | Mean  | Std dev | p     | N                    | Mean  | Std dev | p     |
| <b>3.0</b> | <b>Situational Analysis</b>                                      |                                      |      |         |       |          |      |         |       |                                        |       |         |       |                      |       |         |       |
| 3.1        | Describes the program                                            | 16                                   | 1,63 | 0,719   | 0,000 | 19       | 1,58 | 1,071   | 0,000 | 15                                     | 0,07  | 0,594   | 0,670 | 8                    | 0,00  | 0,535   | 1,000 |
| 3.2        | Determines program evaluability                                  | 17                                   | 1,59 | 0,618   | 0,000 | 19       | 1,84 | 0,688   | 0,000 | 15                                     | 0,00  | 0,655   | 1,000 | 8                    | -0,75 | 0,886   | 0,048 |
| 3.3        | Identifies the interests of relevant stakeholders                | 16                                   | 1,44 | 0,814   | 0,000 | 19       | 1,74 | 0,806   | 0,000 | 15                                     | 0,13  | 0,516   | 0,334 | 8                    | -0,63 | 1,061   | 0,140 |
| 3.4        | Serves the information needs of intended users                   | 17                                   | 1,53 | 0,717   | 0,000 | 19       | 1,53 | 0,841   | 0,000 | 15                                     | -0,07 | 0,704   | 0,719 | 8                    | -0,13 | 0,354   | 0,351 |
| 3.5        | Addresses conflicts                                              | 17                                   | 1,18 | 0,529   | 0,000 | 19       | 1,05 | 0,780   | 0,000 | 15                                     | -0,07 | 0,704   | 0,719 | 8                    | -1,00 | 1,309   | 0,068 |
| 3.6        | Examines the organizational context of the evaluation            | 16                                   | 1,38 | 0,500   | 0,000 | 19       | 1,74 | 0,653   | 0,000 | 14                                     | -0,07 | 0,616   | 0,671 | 8                    | -0,50 | 1,195   | 0,275 |
| 3.7        | Analyzes the political considerations relevant to the evaluation | 17                                   | 1,41 | 0,618   | 0,000 | 19       | 1,68 | 0,582   | 0,000 | 15                                     | 0,00  | 0,655   | 1,000 | 8                    | -0,38 | 0,916   | 0,285 |

**ANNEX TABLE: RESULTS ON EVALUATION OF COMPETENCIES - COHORT 1 AND COHORT 2**

|           |                                                           | LEARNING                             |      |         |       |          |      |         |       |                                        |       |         |       | BEHAVIOR vs LEARNING |       |         |       |
|-----------|-----------------------------------------------------------|--------------------------------------|------|---------|-------|----------|------|---------|-------|----------------------------------------|-------|---------|-------|----------------------|-------|---------|-------|
| items no. | LISTE des COMPETENCES                                     | Before - After the training sessions |      |         |       |          |      |         |       | 1 year after - After training sessions |       |         |       | 1 year after         |       |         |       |
|           |                                                           | COHORT 1                             |      |         |       | COHORT 2 |      |         |       | COHORT 1                               |       |         |       | COHORT 1             |       |         |       |
|           |                                                           | N                                    | Mean | Std dev | p     | N        | Mean | Std dev | p     | N                                      | Mean  | Std dev | p     | N                    | Mean  | Std dev | p     |
| 3.8       | Attends to issues of evaluation use                       | 16                                   | 1,44 | 0,512   | 0,000 | 19       | 1,53 | 0,772   | 0,000 | 15                                     | -0,07 | 0,594   | 0,670 | 8                    | -0,13 | 0,354   | 0,351 |
| 3.9       | Attends to issues of organizational change                | 16                                   | 1,31 | 0,602   | 0,000 | 19       | 1,63 | 0,684   | 0,000 | 14                                     | 0,14  | 0,535   | 0,336 | 8                    | -0,50 | 0,756   | 0,104 |
| 3.10      | Respects the uniqueness of the evaluation site and client | 17                                   | 1,59 | 0,618   | 0,000 | 19       | 1,95 | 0,780   | 0,000 | 15                                     | 0,20  | 0,676   | 0,271 | 8                    | 0,00  | 0,535   | 1,000 |
| 3.11      | Remains open to input from others                         | 17                                   | 0,94 | 0,659   | 0,000 | 19       | 1,00 | 0,943   | 0,000 | 15                                     | -0,13 | 0,640   | 0,433 | 8                    | 0,00  | 0,535   | 1,000 |
| 3.12      | Modifies the study as needed                              | 17                                   | 0,94 | 0,659   | 0,000 | 19       | 1,26 | 0,806   | 0,000 | 15                                     | -0,07 | 0,799   | 0,751 | 8                    | -0,13 | 0,354   | 0,351 |

**ANNEX TABLE: RESULTS ON EVALUATION OF COMPETENCIES - COHORT 1 AND COHORT 2**

|            |                                                                                                    | LEARNING                             |      |         |       |          |      |         |       |                                        |       |         |       | BEHAVIOR vs LEARNING |       |         |       |
|------------|----------------------------------------------------------------------------------------------------|--------------------------------------|------|---------|-------|----------|------|---------|-------|----------------------------------------|-------|---------|-------|----------------------|-------|---------|-------|
| items no.  | LISTE des COMPETENCES                                                                              | Before - After the training sessions |      |         |       |          |      |         |       | 1 year after - After training sessions |       |         |       | 1 year after         |       |         |       |
|            |                                                                                                    | COHORT 1                             |      |         |       | COHORT 2 |      |         |       | COHORT 1                               |       |         |       | COHORT 1             |       |         |       |
|            |                                                                                                    | N                                    | Mean | Std dev | p     | N        | Mean | Std dev | p     | N                                      | Mean  | Std dev | p     | N                    | Mean  | Std dev | p     |
| <b>4.0</b> | <b>Project Management</b>                                                                          |                                      |      |         |       |          |      |         |       |                                        |       |         |       |                      |       |         |       |
| 4.1        | Responds to requests for proposals                                                                 | 16                                   | 1,44 | 0,512   | 0,000 | 19       | 1,63 | 0,597   | 0,000 | 14                                     | 0,00  | 0,555   | 1,000 | 8                    | -0,38 | 0,744   | 0,197 |
| 4.2        | Negotiates with clients before the evaluation begins                                               | 17                                   | 1,53 | 0,624   | 0,000 | 19       | 1,68 | 0,582   | 0,000 | 15                                     | -0,20 | 0,775   | 0,334 | 8                    | -0,38 | 0,744   | 0,197 |
| 4.3        | Writes formal agreements                                                                           | 16                                   | 1,38 | 0,619   | 0,000 | 19       | 1,58 | 0,769   | 0,000 | 14                                     | -0,07 | 0,730   | 0,720 | 8                    | -0,50 | 0,926   | 0,170 |
| 4.4        | Communicates with clients throughout the evaluation process                                        | 16                                   | 1,50 | 0,966   | 0,000 | 19       | 1,95 | 0,524   | 0,000 | 14                                     | -0,36 | 0,745   | 0,096 | 8                    | -0,25 | 0,707   | 0,351 |
| 4.5        | Budgets an evaluation                                                                              | 17                                   | 1,47 | 0,800   | 0,000 | 19       | 1,79 | 0,535   | 0,000 | 15                                     | -0,13 | 0,743   | 0,499 | 8                    | -0,38 | 0,744   | 0,197 |
| 4.6        | Justifies cost given information needs                                                             | 17                                   | 1,47 | 0,717   | 0,000 | 19       | 1,84 | 0,501   | 0,000 | 15                                     | -0,13 | 0,743   | 0,499 | 8                    | -0,50 | 0,756   | 0,104 |
| 4.7        | Identifies needed resources for evaluation, such as information, expertise, personnel, instruments | 17                                   | 1,65 | 0,702   | 0,000 | 19       | 1,79 | 0,535   | 0,000 | 15                                     | -0,07 | 0,594   | 0,670 | 8                    | 0,00  | 0,535   | 1,000 |

**ANNEX TABLE: RESULTS ON EVALUATION OF COMPETENCIES - COHORT 1 AND COHORT 2**

|           |                                                         | LEARNING                             |      |         |       |          |      |         |       |                                        |       |         |       | BEHAVIOR vs LEARNING                                                    |       |         |       |
|-----------|---------------------------------------------------------|--------------------------------------|------|---------|-------|----------|------|---------|-------|----------------------------------------|-------|---------|-------|-------------------------------------------------------------------------|-------|---------|-------|
| items no. | LISTE des COMPETENCES                                   | Before - After the training sessions |      |         |       |          |      |         |       | 1 year after - After training sessions |       |         |       | 1 year after                                                            |       |         |       |
|           |                                                         | COHORT 1                             |      |         |       | COHORT 2 |      |         |       | COHORT 1                               |       |         |       | COHORT 1                                                                |       |         |       |
|           |                                                         | N                                    | Mean | Std dev | p     | N        | Mean | Std dev | p     | N                                      | Mean  | Std dev | p     | N                                                                       | Mean  | Std dev | p     |
| 4.8       | Uses appropriate technology                             | 15                                   | 1,40 | 0,632   | 0,000 | 19       | 1,74 | 0,452   | 0,000 | 14                                     | 0,00  | 0,679   | 1,000 | t cannot be computed because the standard error of the difference is 0. |       |         |       |
| 4.9       | Supervises others involved in conducting the evaluation | 16                                   | 1,50 | 0,816   | 0,000 | 19       | 1,68 | 0,478   | 0,000 | 15                                     | 0,13  | 0,640   | 0,433 | 8                                                                       | -0,50 | 0,926   | 0,170 |
| 4.10      | Trains others involved in conducting the evaluation     | 16                                   | 1,31 | 0,479   | 0,000 | 19       | 1,84 | 0,602   | 0,000 | 14                                     | 0,00  | 0,784   | 1,000 | 7                                                                       | -0,71 | 0,951   | 0,094 |
| 4.11      | Conducts the evaluation in a nondisruptive manner       | 17                                   | 1,35 | 0,702   | 0,000 | 19       | 2,00 | 0,471   | 0,000 | 14                                     | 0,00  | 0,679   | 1,000 | t cannot be computed because the standard error of the difference is 0. |       |         |       |
| 4.12      | Presents work in a timely manner                        | 14                                   | 1,50 | 0,519   | 0,000 | 19       | 1,53 | 0,697   | 0,000 | 13                                     | -0,38 | 0,506   | 0,018 | 8                                                                       | -0,29 | 0,488   | 0,172 |

**ANNEX TABLE: RESULTS ON EVALUATION OF COMPETENCIES - COHORT 1 AND COHORT 2**

|            |                                                                              | LEARNING                             |      |         |       |          |      |         |       |                                        |       |         |       | BEHAVIOR vs LEARNING |       |         |       |
|------------|------------------------------------------------------------------------------|--------------------------------------|------|---------|-------|----------|------|---------|-------|----------------------------------------|-------|---------|-------|----------------------|-------|---------|-------|
| items no.  | LISTE des COMPETENCES                                                        | Before - After the training sessions |      |         |       |          |      |         |       | 1 year after - After training sessions |       |         |       | 1 year after         |       |         |       |
|            |                                                                              | COHORT 1                             |      |         |       | COHORT 2 |      |         |       | COHORT 1                               |       |         |       | COHORT 1             |       |         |       |
|            |                                                                              | N                                    | Mean | Std dev | p     | N        | Mean | Std dev | p     | N                                      | Mean  | Std dev | p     | N                    | Mean  | Std dev | p     |
| <b>5.0</b> | <b>Reflective Practice</b>                                                   |                                      |      |         |       |          |      |         |       |                                        |       |         |       |                      |       |         |       |
| 5.1        | Aware of self as an evaluator (knowledge, skills, dispositions)              | 16                                   | 1,50 | 0,816   | 0,000 | 19       | 1,95 | 0,780   | 0,000 | 14                                     | -0,29 | 0,825   | 0,218 | 7                    | -0,71 | 0,756   | 0,047 |
| 5.2        | Reflects on personal evaluation practice (competencies and areas for growth) | 16                                   | 1,63 | 0,719   | 0,000 | 19       | 2,00 | 0,882   | 0,000 | 14                                     | -0,36 | 1,008   | 0,208 | 7                    | -0,43 | 0,787   | 0,200 |
| 5.3        | Pursues professional development in evaluation                               | 17                                   | 2,00 | 0,866   | 0,000 | 19       | 2,37 | 0,597   | 0,000 | 14                                     | -0,50 | 0,760   | 0,029 | 7                    | -0,43 | 0,787   | 0,200 |
| 5.4        | Pursues professional development in relevant content areas                   | 16                                   | 1,50 | 0,730   | 0,000 | 19       | 1,63 | 0,684   | 0,000 | 13                                     | -0,46 | 0,660   | 0,027 | 6                    | -0,17 | 0,408   | 0,363 |
| 5.5        | Builds professional relationships to enhance evaluation practice             | 16                                   | 1,94 | 0,680   | 0,000 | 19       | 2,00 | 0,745   | 0,000 | 14                                     | -0,64 | 1,008   | 0,033 | 7                    | 0,14  | 0,900   | 0,689 |

**ANNEX TABLE: RESULTS ON EVALUATION OF COMPETENCIES - COHORT 1 AND COHORT 2**

|            |                                                                                               | LEARNING                             |       |         |       |          |      |         |       |                                        |       |         |       | BEHAVIOR vs LEARNING                                                    |       |         |       |
|------------|-----------------------------------------------------------------------------------------------|--------------------------------------|-------|---------|-------|----------|------|---------|-------|----------------------------------------|-------|---------|-------|-------------------------------------------------------------------------|-------|---------|-------|
| items no.  | LISTE des COMPETENCES                                                                         | Before - After the training sessions |       |         |       |          |      |         |       | 1 year after - After training sessions |       |         |       | 1 year after                                                            |       |         |       |
|            |                                                                                               | COHORT 1                             |       |         |       | COHORT 2 |      |         |       | COHORT 1                               |       |         |       | COHORT 1                                                                |       |         |       |
|            |                                                                                               | N                                    | Mean  | Std dev | p     | N        | Mean | Std dev | p     | N                                      | Mean  | Std dev | p     | N                                                                       | Mean  | Std dev | p     |
| <b>6.0</b> | <b>Interpersonal Competence</b>                                                               |                                      |       |         |       |          |      |         |       |                                        |       |         |       |                                                                         |       |         |       |
| 6.1        | Uses written communication skills                                                             | 15                                   | 73,00 | 0,799   | 0,000 | 19       | 0,84 | 0,834   | 0,000 | 14                                     | 0,14  | 0,663   | 0,435 | t cannot be computed because the standard error of the difference is 0. |       |         |       |
| 6.2        | Uses verbal/listening communication skills                                                    | 14                                   | 0,79  | 0,802   | 0,003 | 19       | 0,84 | 0,688   | 0,000 | 14                                     | 0,07  | 0,829   | 0,752 | t cannot be computed because the standard error of the difference is 0. |       |         |       |
| 6.3        | Uses negotiation skills                                                                       | 16                                   | 1,00  | 0,730   | 0,003 | 19       | 1,00 | 0,667   | 0,000 | 15                                     | 0,20  | 0,561   | 0,189 | t cannot be computed because the standard error of the difference is 0. |       |         |       |
| 6.4        | Uses conflict resolution skills                                                               | 14                                   | 0,93  | 0,616   | 0,000 | 19       | 0,89 | 0,658   | 0,000 | 14                                     | -0,29 | 0,726   | 0,165 | 8                                                                       | -0,38 | 0,916   | 0,285 |
| 6.5        | Facilitates constructive interpersonal interaction (teamwork, group facilitation, processing) | 14                                   | 1,00  | 0,555   | 0,000 | 19       | 1,11 | 0,658   | 0,000 | 15                                     | -0,27 | 0,594   | 1,040 | 8                                                                       | -0,25 | 0,707   | 0,351 |
| 6.6        | Demonstrates cross-cultural competence                                                        | 16                                   | 1,13  | 0,619   | 0,000 | 19       | 1,16 | 0,834   | 0,000 | 15                                     | -0,33 | 0,488   | 0,019 | 8                                                                       | -0,38 | 0,744   | 0,197 |
